# Supplementary material
Source: MDPI journal article supplement (https://www.mdpi.com/2218-0532/91/1/16)
Supplement: s1 [file s1 › scipharm-2255386-supplementary.pdf]

## Supplementary data

**Table S1.** Scoring criteria for histopathological evaluation of the wound healing process.

| Histopathological process                     | Score |
|-----------------------------------------------|-------|
| <b>Re-epithelialization</b>                   |       |
| None                                          | 0     |
| Partial                                       | 1     |
| Complete but with immature or skin epithelium | 2     |
| Complete with mature epithelium               | 3     |
| <b>Granulation tissue</b>                     |       |
| None or immature                              | 0     |
| Low amount                                    | 1     |
| Moderate degree of maturation                 | 2     |
| High amount                                   | 3     |
| <b>Collagen accumulation</b>                  |       |
| None                                          | 0     |
| Low amount                                    | 1     |
| Moderate                                      | 2     |
| High amount                                   | 3     |
| <b>Inflammatory cells</b>                     |       |
| None                                          | 0     |
| Low amount                                    | 1     |
| Moderate                                      | 2     |
| High amount                                   | 3     |
| <b>Angiogenesis</b>                           |       |
| None                                          | 0     |
| Less than 5 veins                             | 1     |
| 6-10 veins                                    | 2     |
| More than 10 veins                            | 3     |
| <b>Ulcer</b>                                  |       |
| None                                          | 0     |
| Small                                         | 1     |
| Large                                         | 2     |
| Large or deep, abscess formation              | 3     |

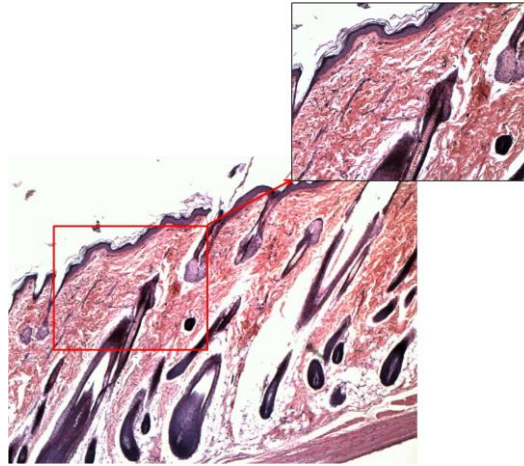

**Figure S1.** Skin, excisional wound, rat. Normal skin. Dermis is intact and adnexal structures are present (hair follicle, sweat glands). H&E stain. 4X and 10X.

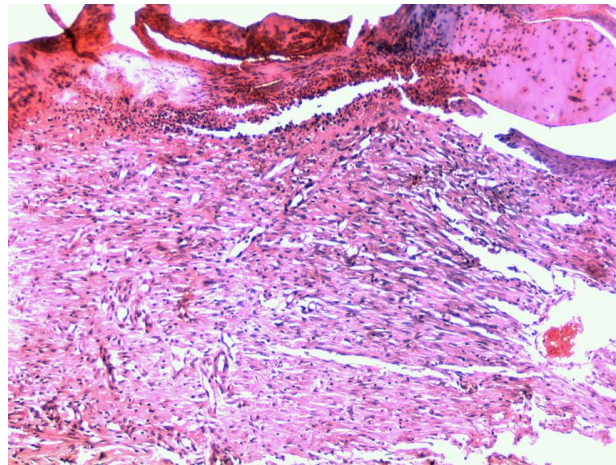

**Figure S2.** Skin, excisional wound, rat. Incomplete wound healing. Ulcer score 3, pinkish colour indicates serum. Crust formation (scab). H&E stain. 10X.

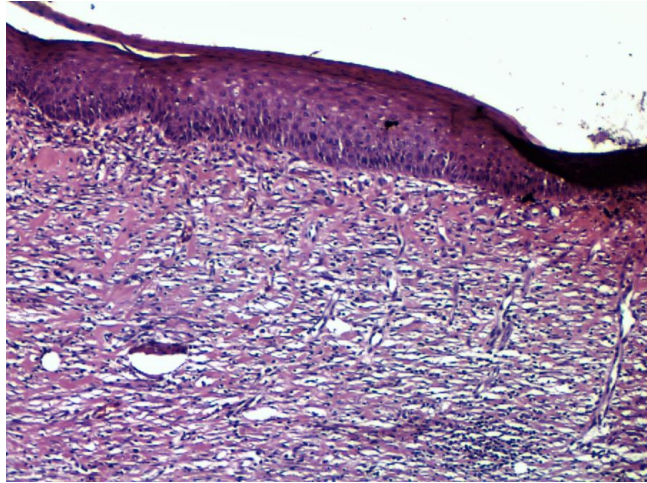

**Figure S3.** Skin, excisional wound, rat. Complete re-epithelialization. The dermis is markedly hypercellular by fibroplasia and collagen deposition, new blood vessel formation that were perpendicular to the fibroblast at day 21<sup>st</sup>. H&E stain. 10X.

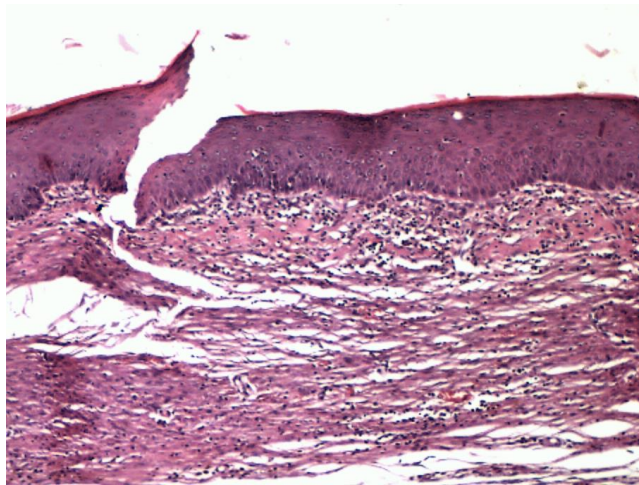

**Figure S4.** Skin, excisional wound, rat. The skin tissue is completely healed with few inflammatory cells and fibroplasia. The epidermis is one layer and continuous at day 21<sup>st</sup>. H&E stain. 10X.

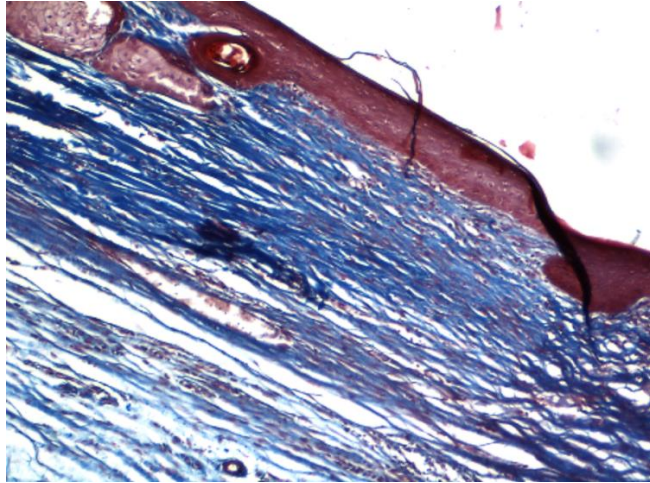

**Figure S5.** Skin, excisional wound, rat. Completely healed skin tissue. The epidermis is one and continuous at day 21<sup>st</sup>. MT stain. 10X.

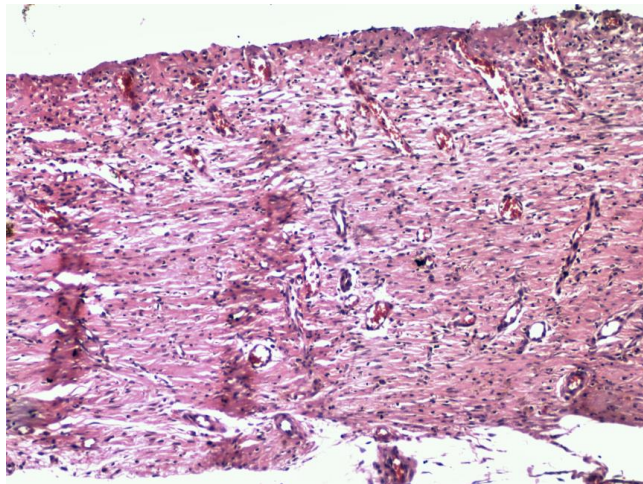

**Figure S6.** Skin, excisional wound, rat. The tissue skin with score 3 angiogenesis that has more than 10 veins in the wounded area at day 21<sup>st</sup>. H&E stain. 10X.

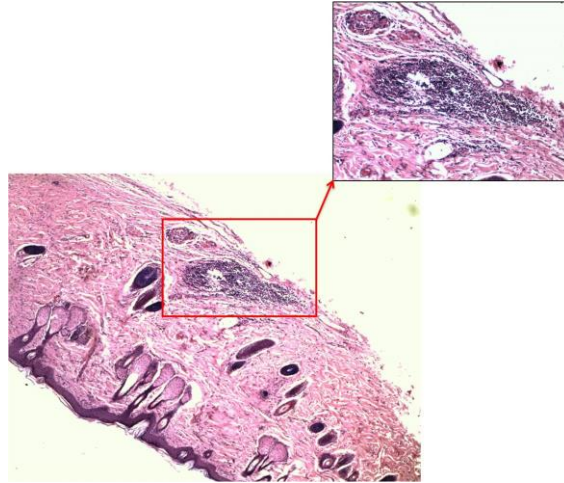

**Figure S7.** Skin, excisional wound, rat. Deep inflammation; deep focal inflammatory cells and granuloma formation. H&E stain. 4X and 10X.

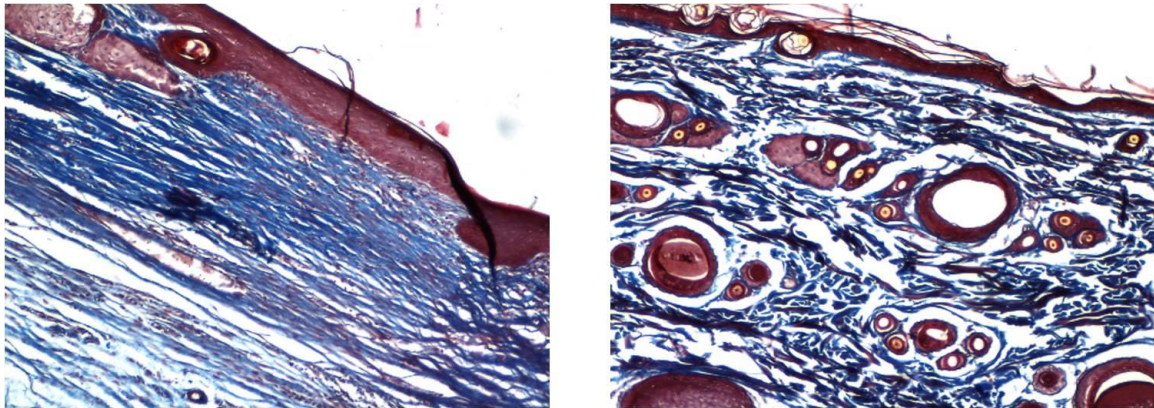

**Figure S8.** Skin, excisional wound, rat. (a) Completely healed skin with marked connective tissue (b) normal un-wounded skin with marked connective tissue. (a) the wound was completely closed and covered with mature epidermal squamous cells. The skin wound sections were relatively normal except for adnexal structure that were completely absent at day 21<sup>st</sup>. Collagen accumulation is denser than normal tissue. (b) normal un-wounded skin with adnexal structures present, and less collagen accumulation. MT stain. 10X.

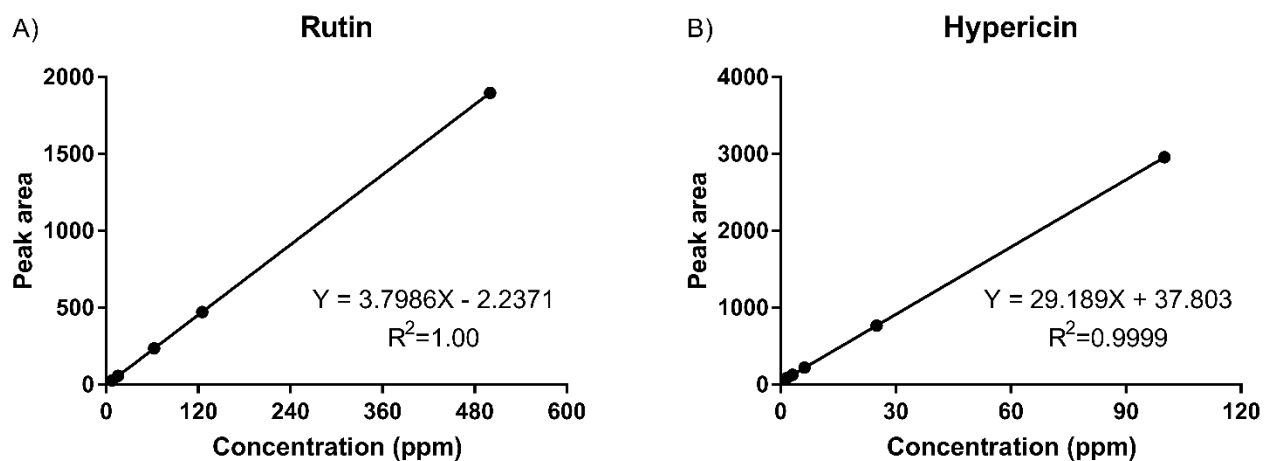

**Figure S9.** Calibration curves for rutin (A) and hypericin (B).

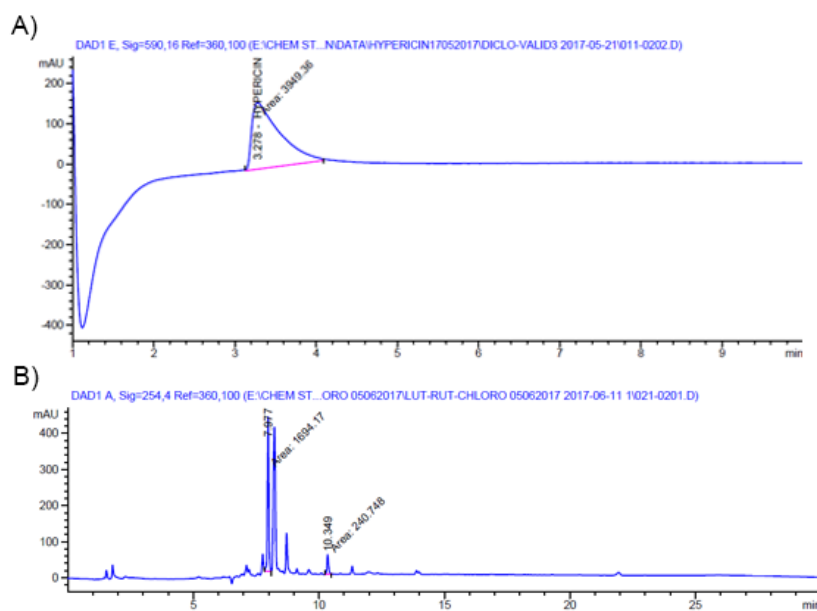

**Figure S10.** HPLC chromatograms for *H. triquetrifolium* extract (a) chromatogram at  $\lambda = 590$  nm for hypericin detection and (b) chromatogram at  $\lambda = 254$  nm for rutin detection.

**Table S2.** Calibration curves' linear regressions ( $r^2$ ) and range.

| Standard compound | $r^2$  | Range $\mu\text{g/mL}$ (ppm) |
|-------------------|--------|------------------------------|
| Rutin             | 1.00   | 7.81-500                     |
| Hypericin         | 0.9999 | 1.56-100                     |
